# Supplementary material for: Influence of Cooking Methods on Glucosinolates and Isothiocyanates Content in Novel Cruciferous Foods
Source: PubMed Central journal article supplement (PMC6679111; doi:10.3390/foods8070257), 2019-07-12
Supplement: foods-08-00257-s001.pdf [file foods-08-00257-s001.pdf]

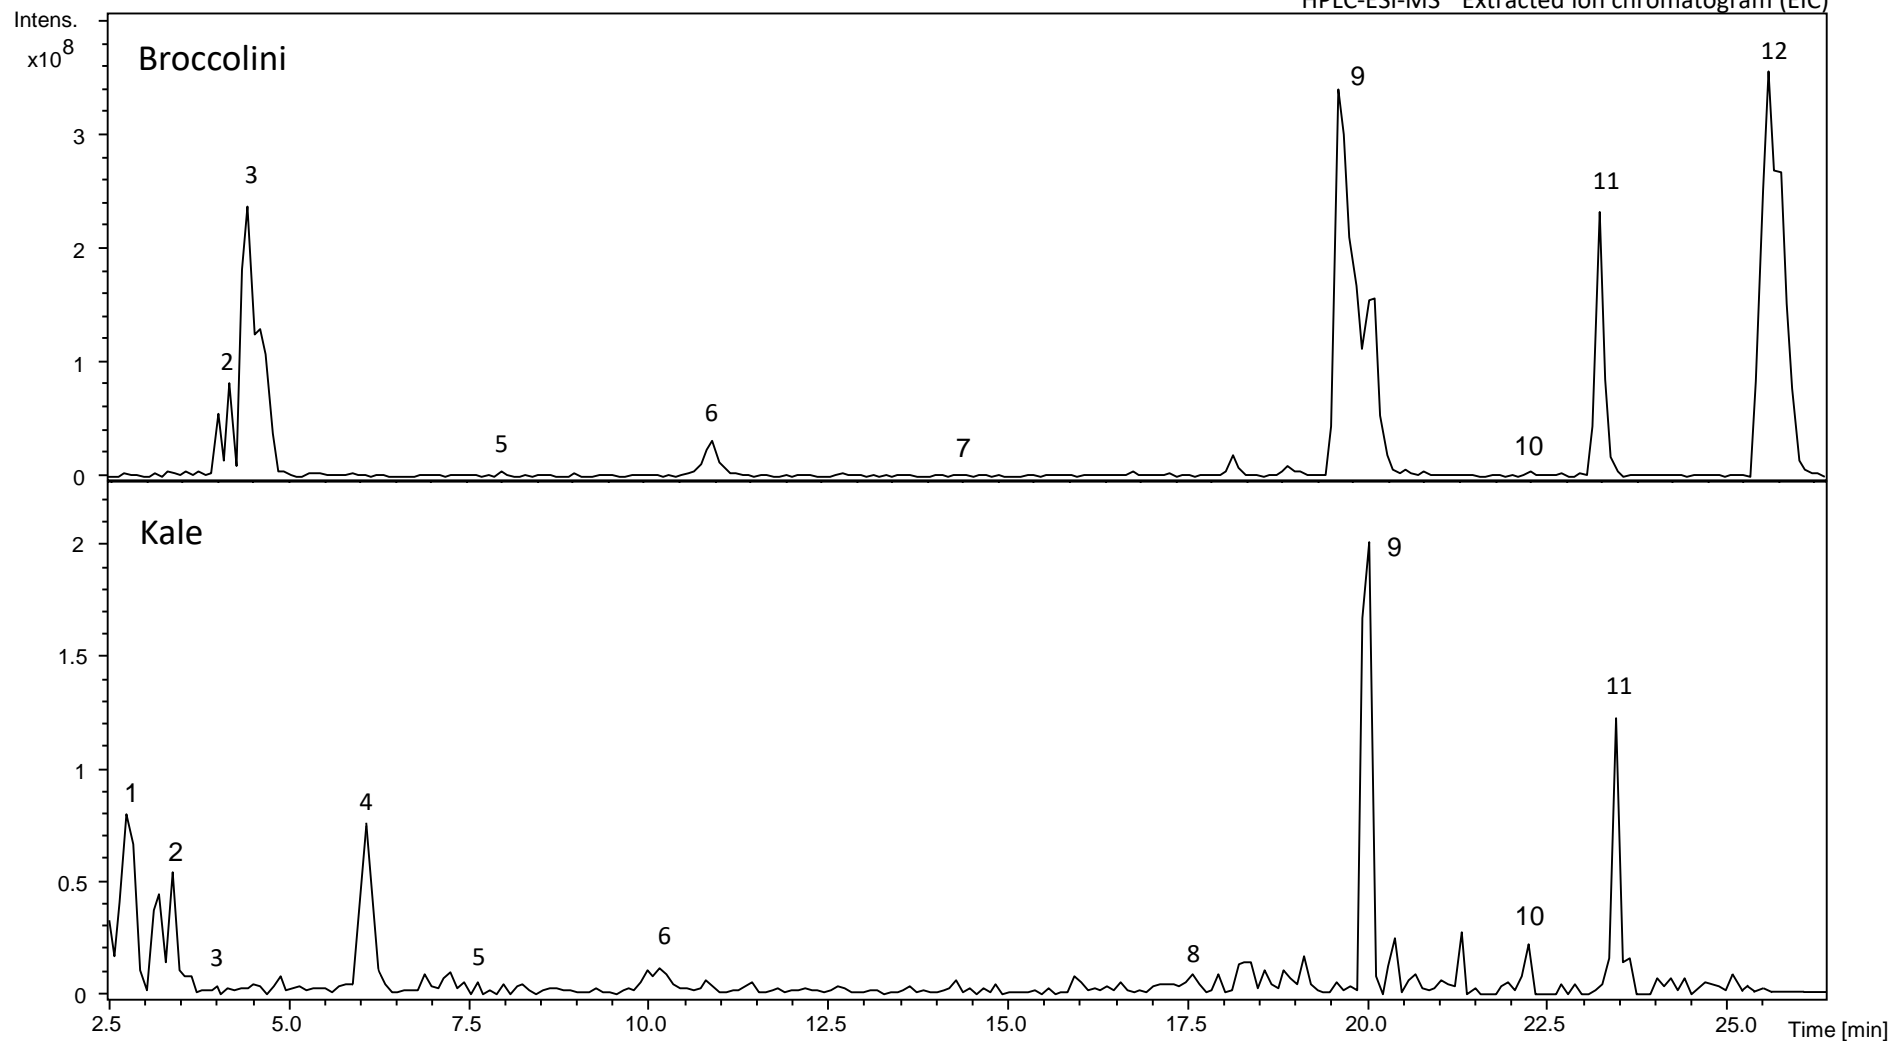

Identification of glucosinolates in fresh *Brassica* samples following their MS<sup>2</sup> [M-H]<sup>-</sup> fragmentations in HPLC-DAD-ESI-MS<sup>n</sup> :

- |                                      |                                       |
|--------------------------------------|---------------------------------------|
| 1. Glucoiberin (m/z 422)             | 7. Glucosinalbin (m/z 424)            |
| 2. Progoitrin (m/z 388)              | 8. Glucobrassicinapin (m/z 386)       |
| 3. Glucoraphanin (m/z 436)           | 9. Glucobrassicin (m/z 447)           |
| 4. Sinigrin (m/z 358)                | 10. Gluconasturtin (m/z 422)          |
| 5. Gluconapin (m/z 372)              | 11. 4-Methoxyglucobrassicin (m/z 477) |
| 6. 4-Hydroxyglucobrassicin (m/z 463) | 12. Neoglucobrassicin (m/z 477)       |
